# Supplementary material for: Unveiling MOF-808 photocycle and its interaction with luminescent guests
Source: Royal Society of Chemistry journal article supplement (doi:10.1039/d4cp02279c), 2024-01-01
Supplement: d4cp02279c1.pdf [file d4cp02279c1.pdf]

# Unveiling MOF-808 Photocycle and its Interaction with Luminescent Guests

G. Ficarra<sup>1,\*</sup>, A. Sciortino<sup>1,\*</sup>, L.G. Barbata<sup>1</sup>, R. Ettliger<sup>2,4</sup>, V. De Michele<sup>3</sup>, E. Marin<sup>3</sup>, M. Cannas<sup>1</sup>, R.E. Morris<sup>2</sup>, and G. Buscarino<sup>1,\*</sup>

<sup>1</sup>Department of Physics and Chemistry “Emilio Segrè”, University of Palermo, Via Archirafi 36, 90123, Palermo, Italy

<sup>2</sup>EastChem School of Chemistry, University of St Andrews, North Haugh, St Andrews, UK

<sup>3</sup>Université Jean Monnet, CNRS, IOGS, Laboratoire Hubert Curien UMR 5516, 42000 Saint-Etienne, France

<sup>4</sup>TUM School of Natural Sciences Technical University of Munich Lichtenbergstr.4; 85748 Garching b. München, Germany

\*giuseppe.ficarra02@unipa.it, alice.sciortino02@unipa.it, gianpiero.buscarino@unipa.it

## MOF-808 particle's size

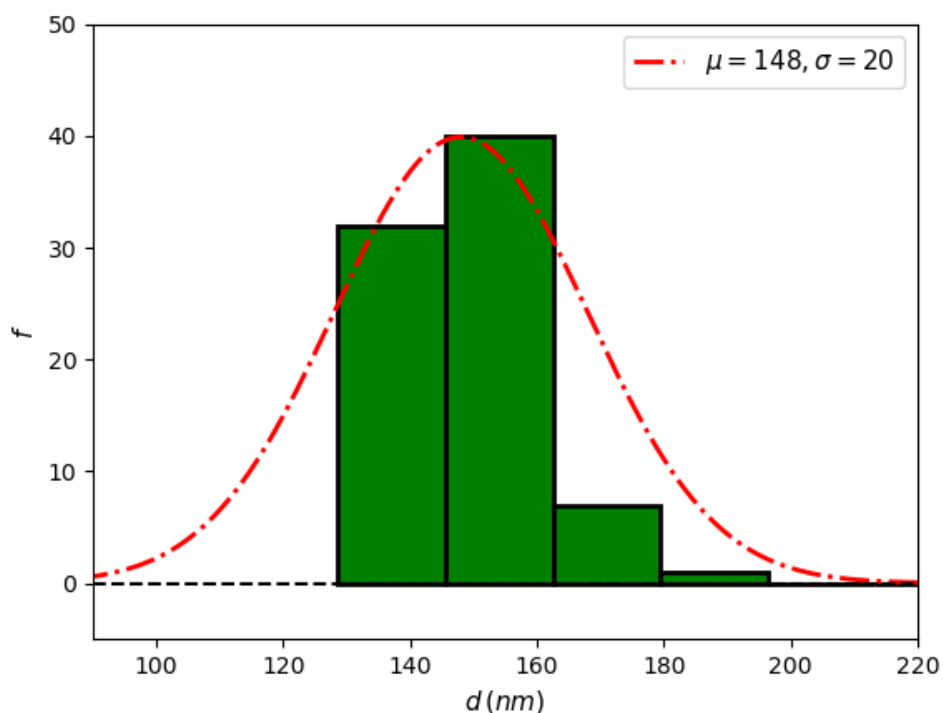

**Figure S1.** The green histogram represents the particle's size distribution for MOF-808 obtained by collecting SEM images, while the dashodotted red line is an overlapping Gaussian function with 148 nm mean value and 20 nm variance.

## MOF-808 H<sub>2</sub>O

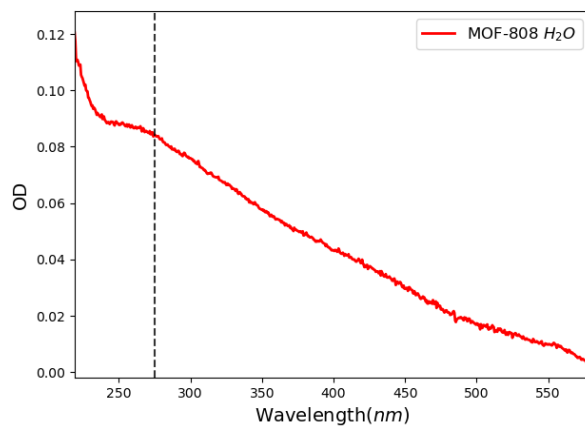

**Figure S2.** Optical absorption of MOF-808 in H<sub>2</sub>O in red, the dashed line indicating the absorption peak.

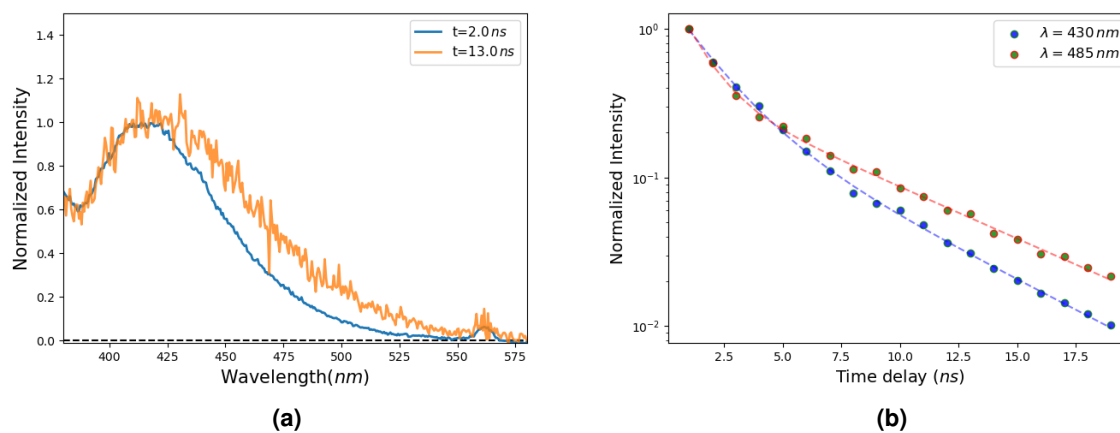

**Figure S3.** (a) The emission band of MOF-808 in water at 2.0 ns is reported in blue, in orange the band at 13.0 ns from the photoexcitation; (b) Blue dots are the kinetic decay taken at 430 nm: there are two components of lifetime resulting from a double exponential fitting: 1.8 ns and 5.3 ns. Green dots are relative to the 485 nm kinetic from which result 1.6 ns and 6.2 ns components.

## MOF-808 powder

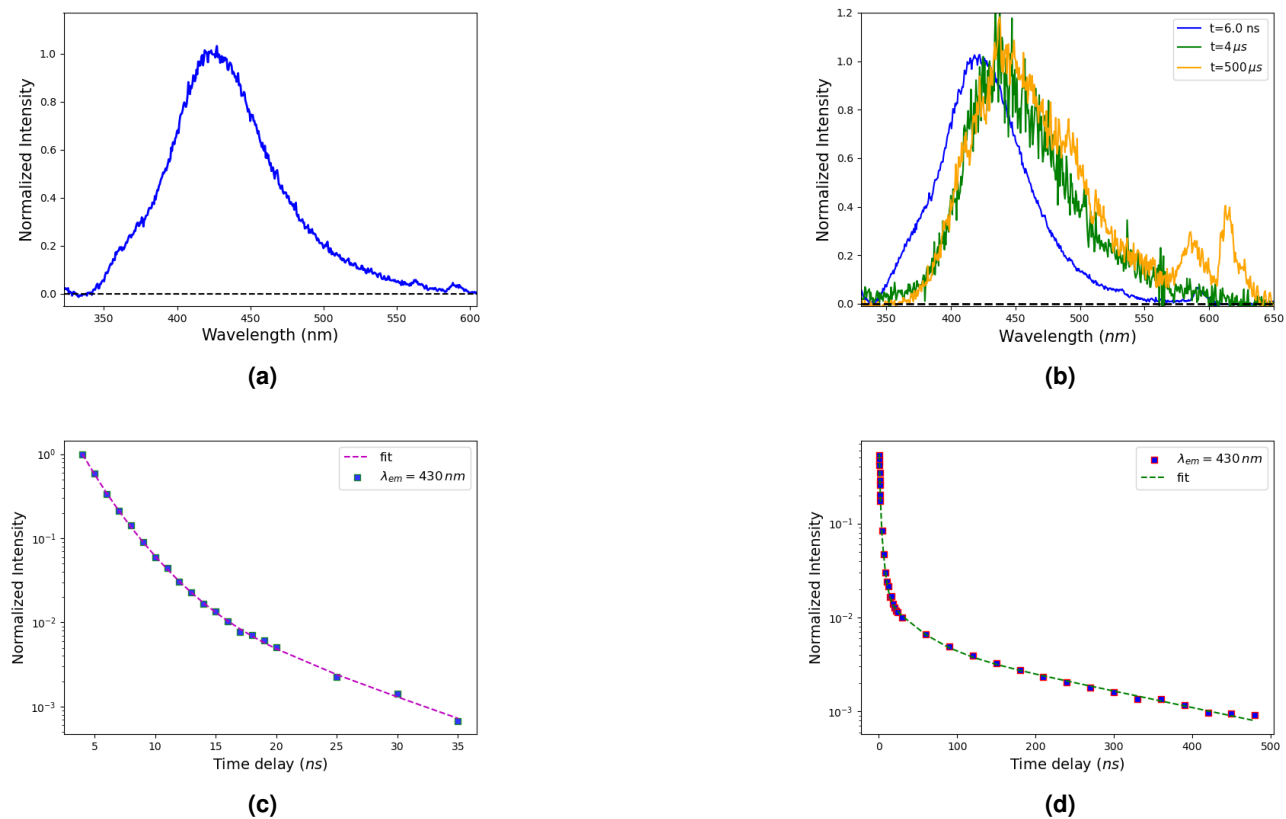

**Figure S4.** (a) PL spectrum of MOF-808 in powder with a peak centered at 425 nm; (b) PL spectra collected at different time from the photoexcitation: 6 ns in blue, 4 μs in green and 500 μs, the last spectrum is centered at 450 nm. (c) The kinetic decay of MOF-808 up to 35 ns is reported with blue squares while the purple line represents the double exponential fitting; (d) The kinetic decay of MOF-808 from 2 to 500 μs is reported with blue squares while the dashed green line represents the best curve fit.

## TA kinetics fitting

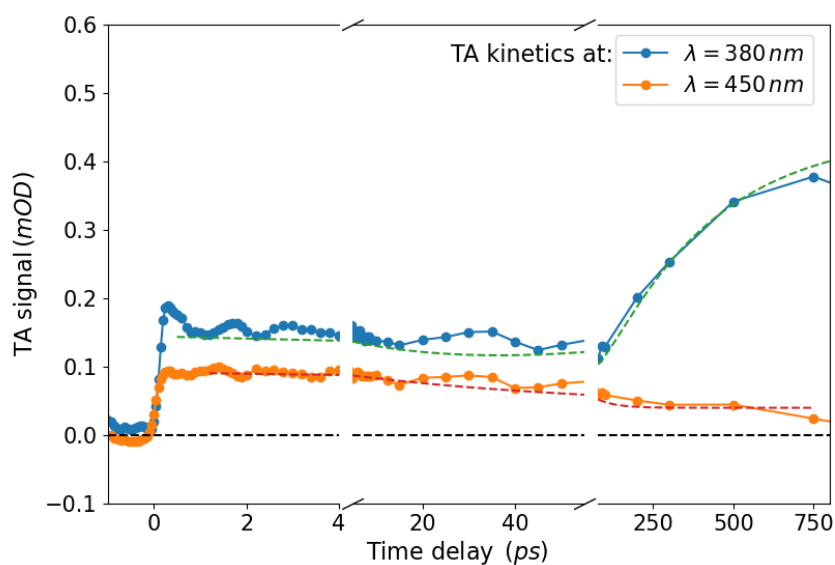

**Figure S5.** TA kinetic traces at 380 and 450 nm with respective best curve fit.

## N<sub>2</sub> adsorption RhB@MOF-808

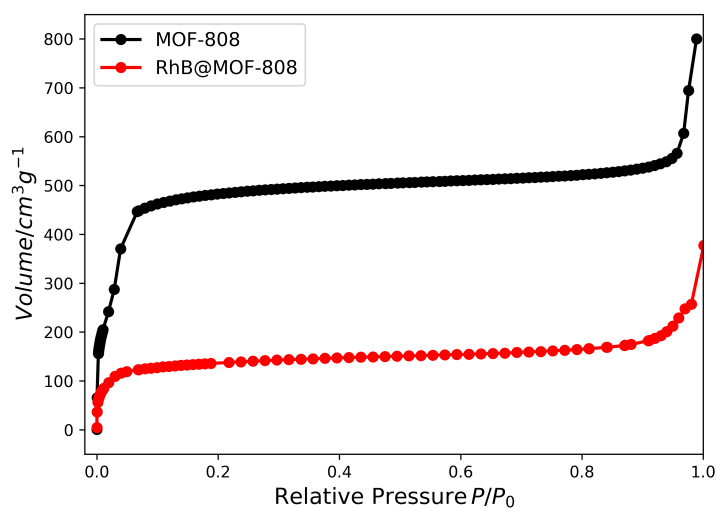

**Figure S6.** N<sub>2</sub> adsorption of RhB@MOF-808 (red curve) and bare MOF-808 (black curve) also reported in the main paper. The estimated internal surface area is  $577 \text{ m}^2 \text{ g}^{-1}$  for the MOF-808 loaded with Rhodamine B.

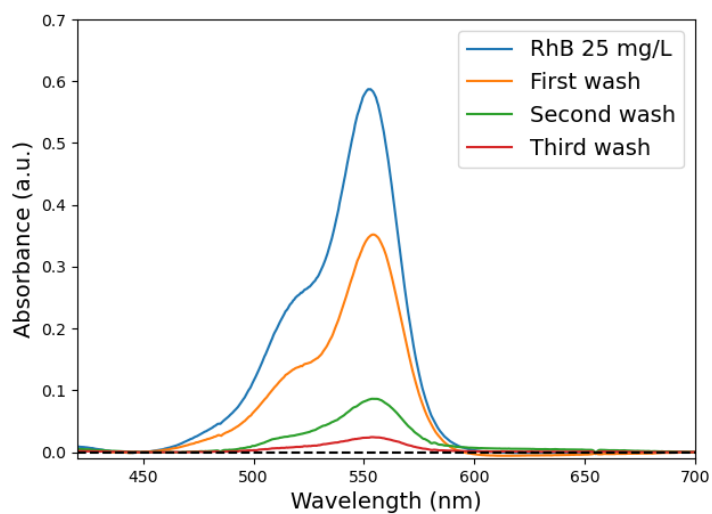

**Figure S7.** Absorbance spectra of Rhodamine B mother solution (25 mg/L) and of the supernatant solutions obtained after subsequent washing steps.

### Rhb@MOF-808 in $H_2O$

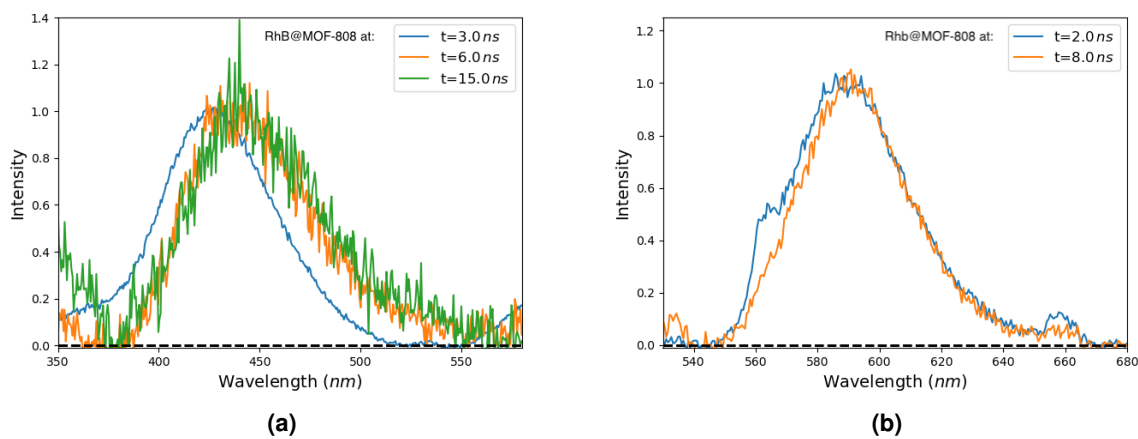

**Figure S8.** (a) The blue band of RhB@MOF-808 in water which is centered at 430 nm and undergoes a redshift with time up to 450 nm; (b) Red emission band of RhB@MOF-808 which maintains its position unchanged with respect to time delay.

## RhB@MOF-808

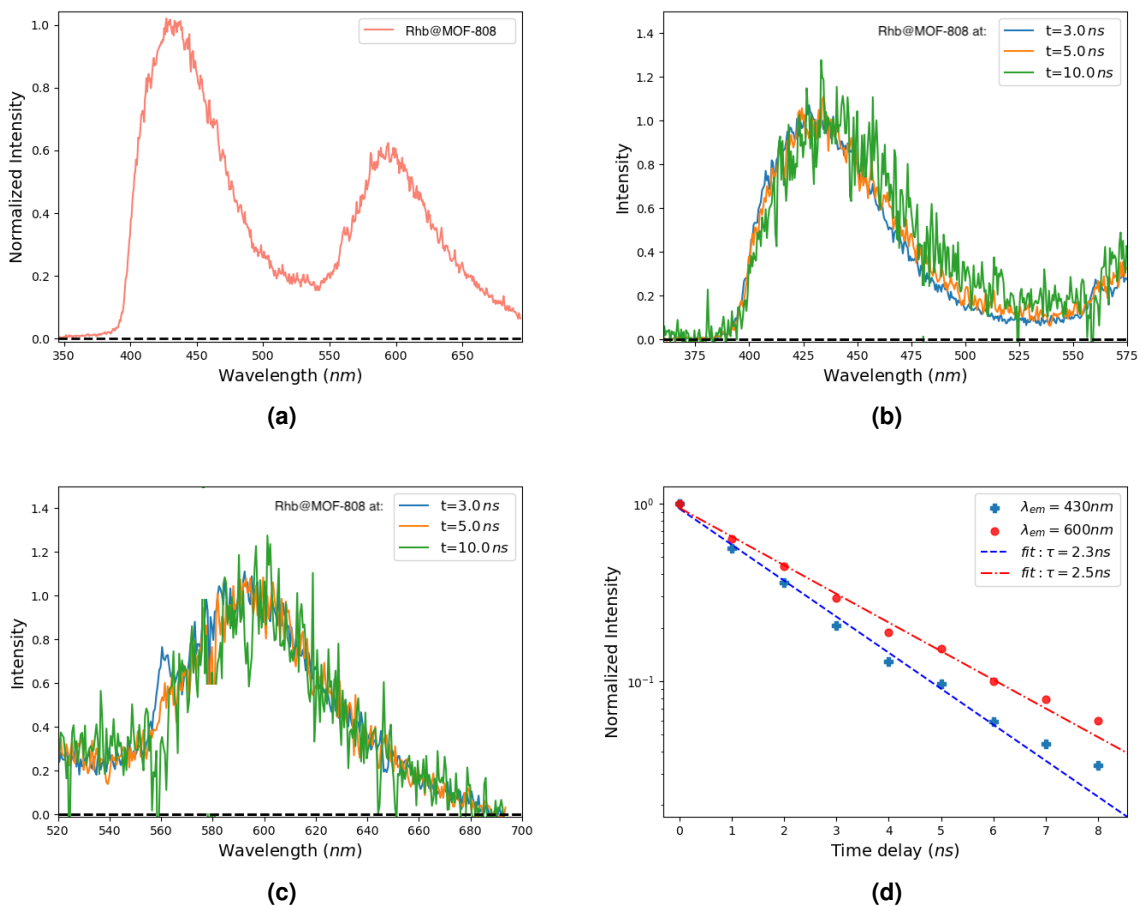

**Figure S9.** (a) PL spectra of RhB@MOF-808 in powder, the abrupt cut in the blue spectral region is due to a 400 nm filter; (b) Emission band related to the MOF-808 itself reported at different time delays; (c) Emission band related to the encapsulated Rhodamine B reported with different time delays; (d) Blue markers are the kinetic decay of the blue band ( $\lambda_{em} = 430\text{nm}$ ), while the red dots correspond to the kinetic of the band centered at  $\lambda_{em} = 590\text{nm}$ . The red and blue dashed lines are the respective monoexponential fitted curves.

## Photobleaching

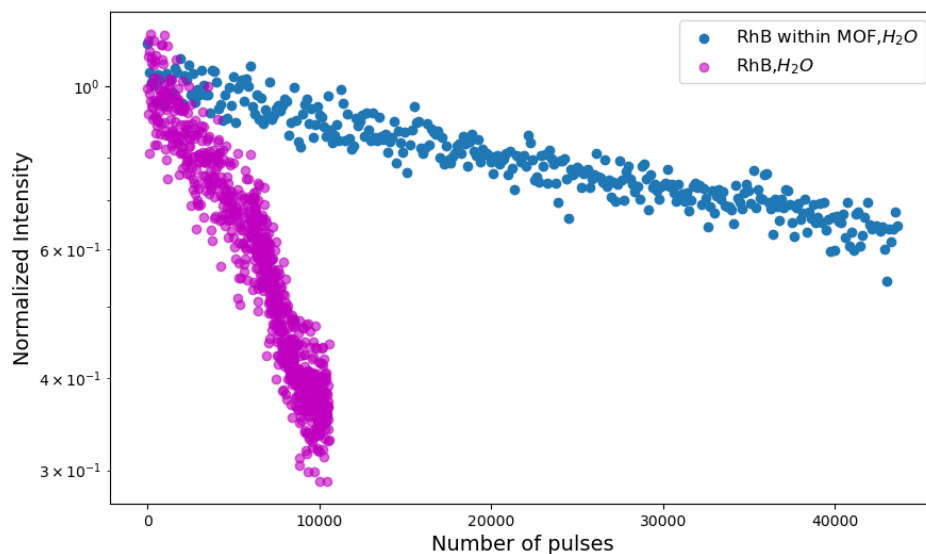

**Figure S10.** Photobleaching kinetics of bare Rhodamine B (pink dots) and Rhodamine encapsulated within the MOF cavities (blue dots).

## PL of BTC and Metal oxocluster

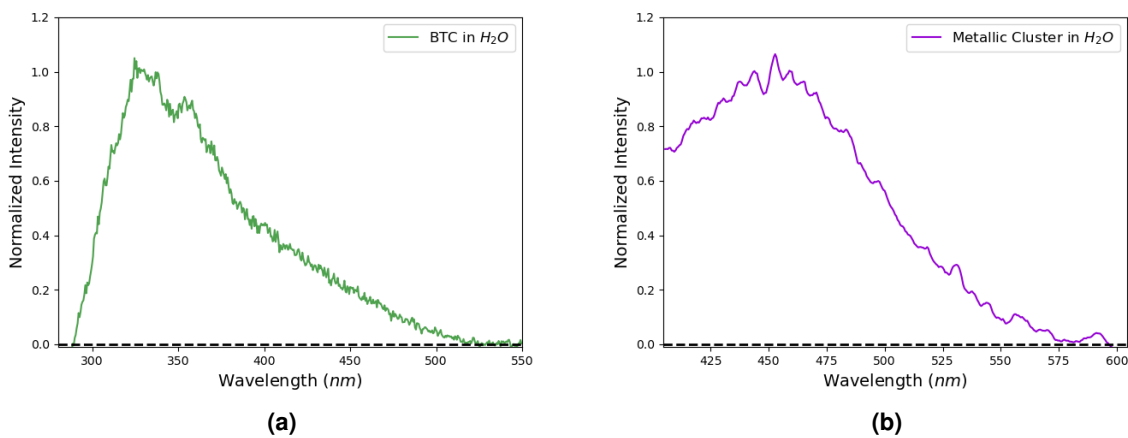

**Figure S11.** (a) The green emission band is the PL showed by the organic ligand when in water, the principal activity is centered at 330 nm; (b) The violet broad band is the emission of the metallic cluster in water and it is centered at 450 nm.

## Photocycle of RhB@MOF-808

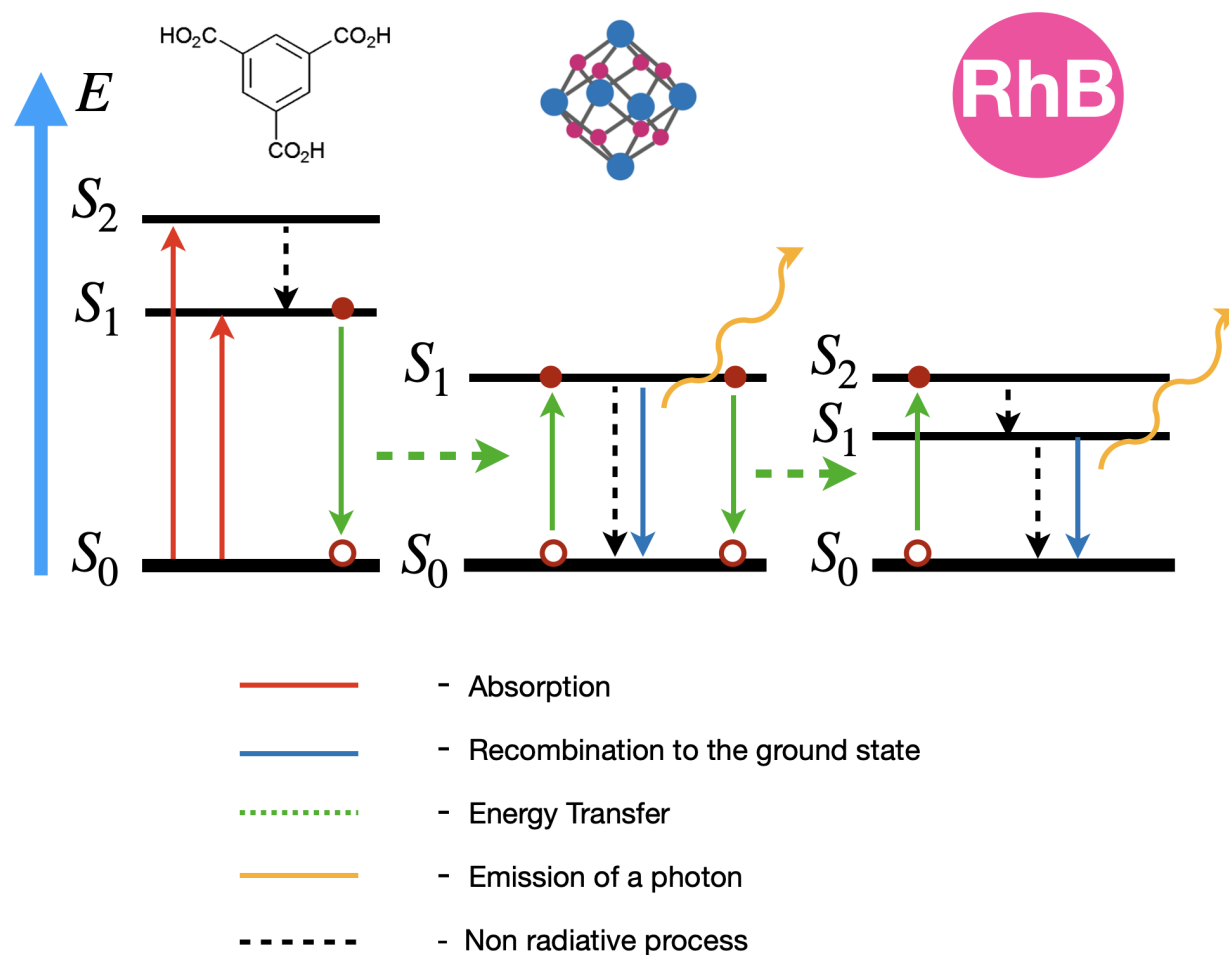

**Figure S12.** Photocycle of the dual-emitting system RhB@MOF-808. From the left to the right are depicted the ligand BTC, the metal oxocluster and finally the guest dye Rhodamine B. On the bottom there is a legend where all the involved processes are summarized.
